# Supplementary material for: Minimally disruptive optical control of protein tyrosine phosphatase 1B
Source: PubMed Central journal article supplement (PMC7005756; doi:10.1038/s41467-020-14567-8), 2020-02-07
Supplement: 41467_2020_14567_MOESM10_ESM.pdf [file 41467_2020_14567_MOESM10_ESM.pdf]

**Title:** Supplementary Data 1.

**Description:** Analysis of Photoswitching. This table provides estimates of dynamic range, including error and sample sizes, for the activity of PTP-LOV2 chimeras on 4MUP, pNPP, and a phosphopeptide substrate.

**Title:** Supplementary Data 2.

**Description:** Analysis of kinetics. This table provides initial rates of pNPP hydrolysis, including error and sample sizes, used to construct Michaelis-Menten curves.

**Title:** Supplementary Data 3.

**Description:** Analysis of reversibility. This table provides initial rates of pNPP hydrolysis, including error and sample sizes, used to examine the reversibility of photomodulation.

**Title:** Supplementary Data 4.

**Description:** Circular dichroism spectroscopy. This table provides CD-based estimates of light-induced changes in  $\alpha$ -helical content, including error and sample sizes, used to construct Figures 2c and 2g.

**Title:** Supplementary Data 5.

**Description:** Fluorescence spectroscopy. This table provides fluorescence-based measurements of tryptophan fluorescence, including error and sample sizes, used to construct Figure 2g.

**Title:** Supplementary Data 6.

**Description:** In vitro analysis of FRET-based biosensor. This table provides discrete measurements of donor/acceptor emission ratio, including error and sample sizes, used to construct Figures 4b and 4c.

**Title:** Supplementary Data 7.

**Description:** Whole-cell imaging studies. This table provides live-cell FRET measurements used to construct Figure 4c.

**Title:** Supplementary Data 8.

**Description:** Enzyme-linked immunosorbent assay (ELISA). This table provides ELISA-based measurements of insulin receptor phosphorylation.
